# Supplementary material for: Magnetically guided chemical locomotion of self-propelling paperbots
Source: Royal Society of Chemistry journal article supplement (doi:10.1039/c5ra10159j), 2015-01-01
Supplement: c5ra10159j1.pdf [file c5ra10159j1.pdf]

## Supplementary Information

for

### Magnetically Guided Chemical Locomotion of Self-Propelling Paperbots

Amit Kumar Singh,<sup>a</sup> Tapas Kumar Mandal,<sup>\*ab</sup> and Dipankar Bandyopadhyay<sup>\*ab</sup>

<sup>a</sup>Centre for Nanotechnology, <sup>b</sup>Department of Chemical Engineering,  
Indian Institute of Technology Guwahati, Guwahati – 781039, India.

\* Corresponding author: dipban@iitg.ernet.in, tapasche@iitg.ernet.in

#### Fabrication of magneto-catalytic paper microjets

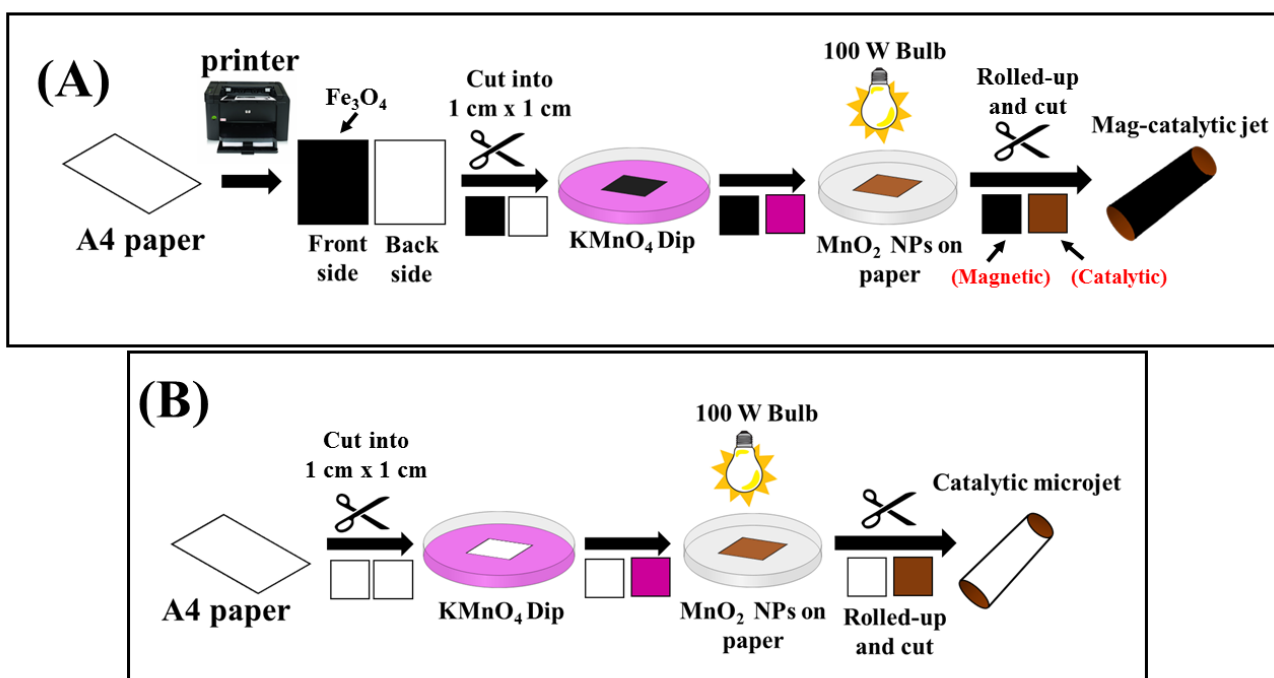

**Figure S1.** Fabrication of (A) magneto (Mag)-catalytic paper microjet and (B) catalytic paper microjet.

The microjet was fabricated using discarded paper sheets from the black and white laser jet printer (Figure S1 A). The one side of the flat piece of paper was uniformly coated with the toner ink of the

printer by taking a printout in black ink, which infused the magnetic sensitivity by depositing ferromagnetic layer of Fe<sub>3</sub>O<sub>4</sub> microparticles on the paper surface.<sup>1</sup> Thereafter, the paper was cut into 1 cm × 1 cm square pieces. Following this, the manganese dioxide nanoparticles (MnO<sub>2</sub>NPs) were deposited chemically on the non-printed side of the paper. The non-printed side of paper was dipped horizontally into a 0.45 M alkaline KMnO<sub>4</sub> (KMnO<sub>4</sub>: NaOH = 1:1 in molar ratio) in such a way that the KMnO<sub>4</sub> makes a thin coating on the paper surface. Then the alkaline KMnO<sub>4</sub> coated paper was kept at room temperature for 10 h under a 100 W incandescent light exposure. The color of the paper surface changed from purple to brown due to formation of MnO<sub>2</sub>NPs. The product was then washed with water and dried at 60 °C for 2 h. The detailed mechanism for formation of MnO<sub>2</sub>NPs over cellulose fibers of paper have been previously explained by Wang *et al.*<sup>2</sup> The MnO<sub>2</sub>NPs infused the chemical activation of the paper as the MnO<sub>2</sub>NPs could catalytically decompose H<sub>2</sub>O<sub>2</sub> ( $2\text{H}_2\text{O}_2 \rightarrow 2\text{H}_2\text{O} + \text{O}_2$ )<sup>3</sup> when the paper was immersed inside a bath of peroxide fuel. After the deposition of MnO<sub>2</sub>NPs, the flat piece of paper was rolled up manually and sealed with adhesive to form a tubular microjet where the toner ink coating stayed outside and the MnO<sub>2</sub>NPs stays at the inner hollow core in the range of 300-600 μm. Thereafter, the tubular microjet was cut into pieces with a sharp surgical scissor of varying length ranging from 900 μm to 2 mm. The microjets of size ~ 900 μm with diameter opening of ~350 μm were used for all the experiments. The microjets were cut randomly and only those were selected for the experiments, which had significant difference in the diameter at the sides. This ensured that the shape of the microjet was similar to the frustum of a cylinder, which was verified through the microscopic inspections. For fabrication of catalytic microjet without the magnetic handle, a non-printed paper of dimension 1 cm × 1 cm was cut before following the steps mentioned previously to coat the MnO<sub>2</sub>NPs, as shown in the Figure **S1 B**.

### **Fabrication of fluorescent catalytic paper microjets**

The fluorescein sodium salt was dissolved in water to obtain 0.1 M solution. The solution was drop casted on the paper microjets and then the catalytic microtubes were dried at 40 °C for 2 h. The

fluorophore solution stained the cellulose fibers of the paper microjets making it fluorescent.<sup>4</sup> The fluorescence activity is observed at UV excitation of 494 nm. The paper microjet appeared to be green in color (Figure S2 B).

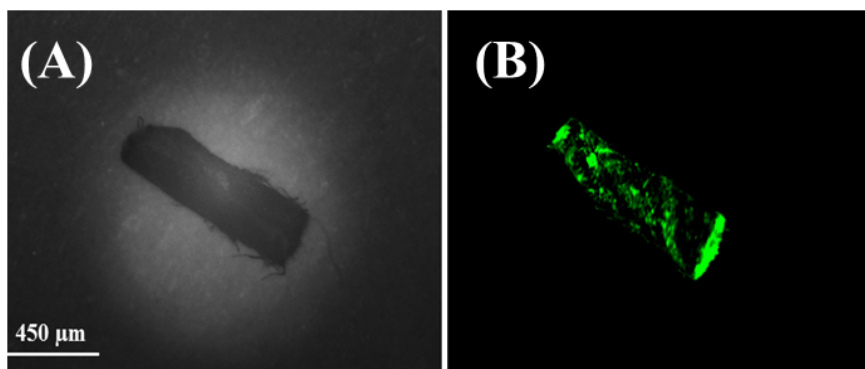

**Figure S2.** (A) The optical micrograph of tubular catalytic paper microjet ( $\sim 900 \mu\text{m}$ ) at 2.5X magnification. (B) The fluorescein-tagged microjet observed under microscope at 494 nm excitation wavelength.

#### Rate constant measurement for $\text{H}_2\text{O}_2$ decomposition

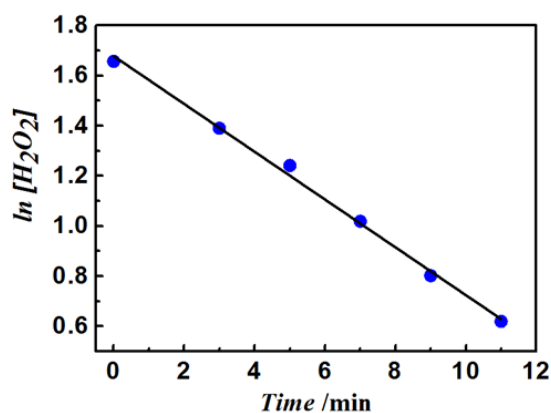

**Figure S3.** Rate constant ( $k$ ) of 10% (v/v)  $\text{H}_2\text{O}_2$  decomposition for one catalytic paper microjet.

Figure S3 shows the reaction kinetics for the 10% (v/v) hydrogen peroxide ( $\text{H}_2\text{O}_2$ ) decomposition by a catalytic paper microjet. In presence of a catalytic microjet, the rate of decomposition of 10% (v/v)  $\text{H}_2\text{O}_2$  followed first-order kinetics<sup>5</sup> with the rate constant,  $k = 0.095 \text{ min}^{-1}$ .

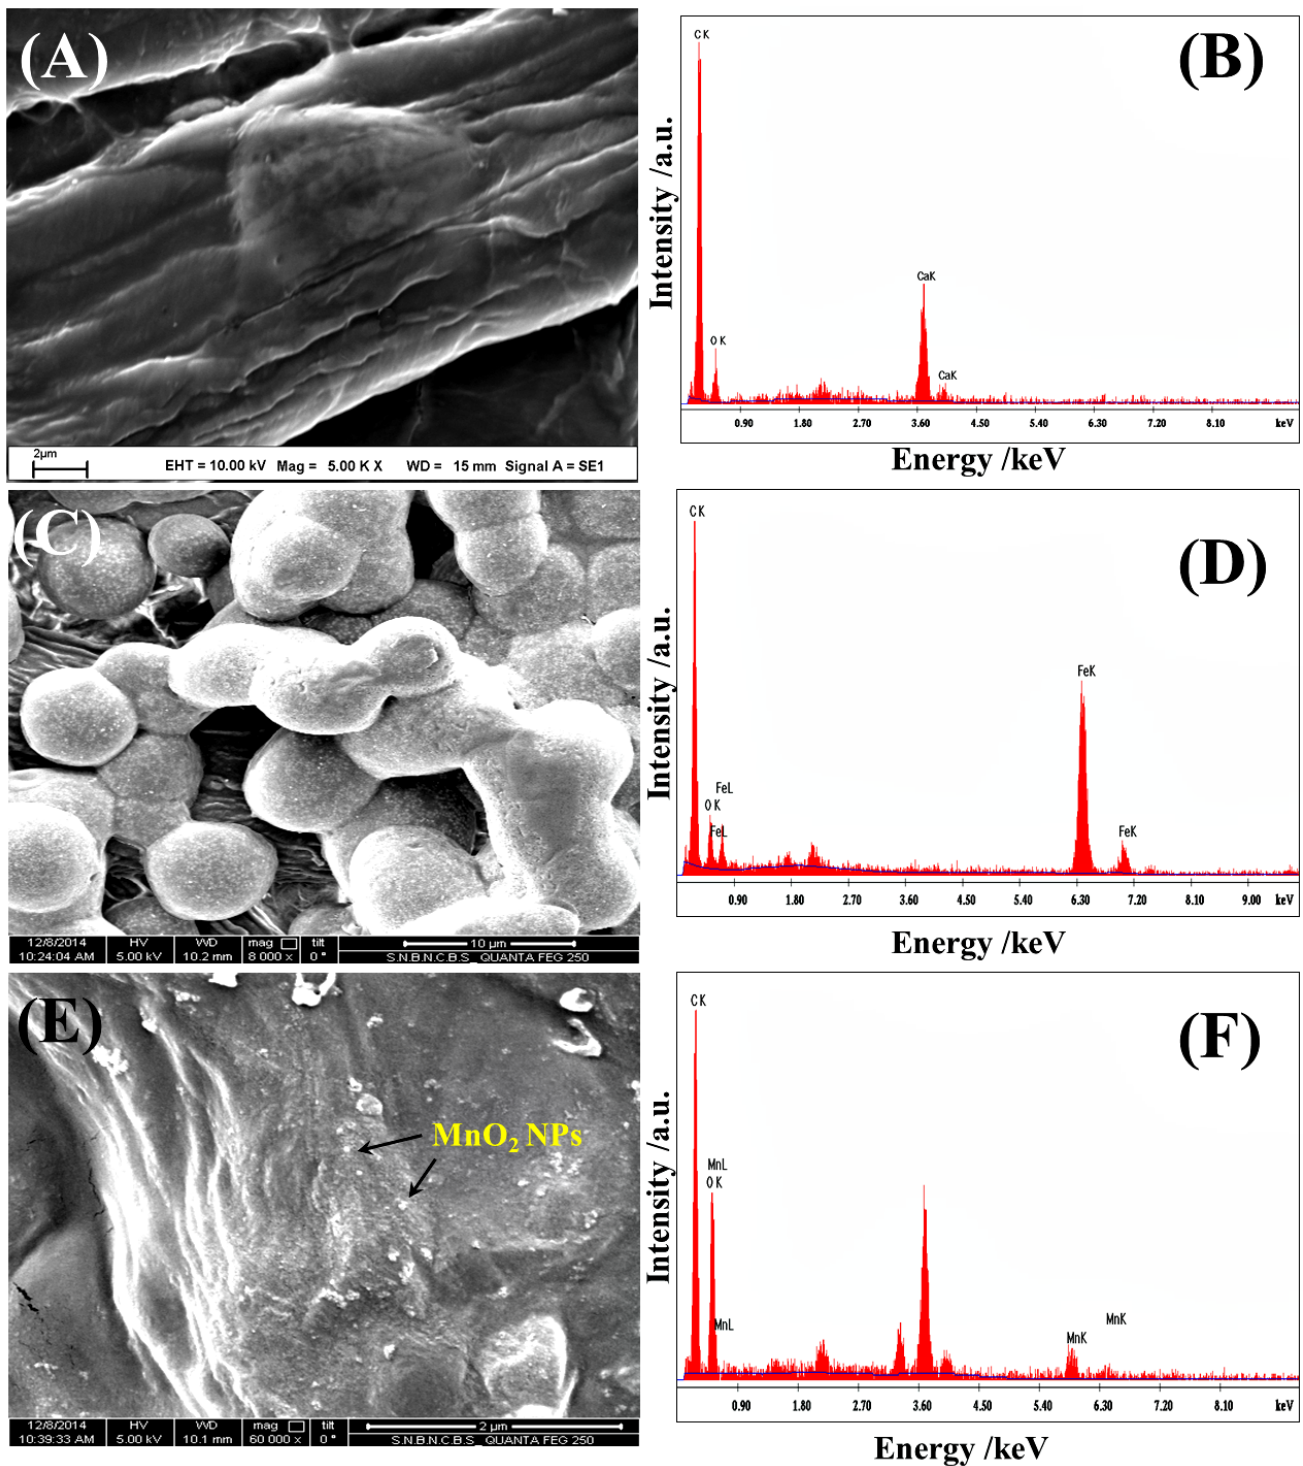

**Figure S4.** (A) Field emission scanning electron microscopy (FESEM) image of an uncoated cellulose fiber of printer paper. The scale bar at the bottom is of 2  $\mu\text{m}$ . (B) Energy Dispersive X-ray (EDX) of the uncoated cellulose fiber. (C) FESEM image of a cellulose fiber of printer paper in which the  $\text{Fe}_3\text{O}_4$ -microparticles were observed, which was distributed over the fiber surface. The scale bar at the bottom is of 10  $\mu\text{m}$ . (D) EDX of  $\text{Fe}_3\text{O}_4$ -based micro-globules on cellulose fibers shows the Fe and O peak. (E) FESEM image of a cellulose fiber coated with  $\text{MnO}_2$ NPs.  $\text{MnO}_2$ NPs were randomly distributed over the fibers surface. The scale bar at the bottom is of 2  $\mu\text{m}$ . (F) EDX of a cellulose fiber coated with  $\text{MnO}_2$ NPs shows the Mn and O peak.

The uncoated printer paper was characterized using Zeiss Sigma FESEM, operating at a maximum voltage of 10 kV and at magnification of 5.0 kx. FESEM image shows a single cellulose fiber of printer paper of width  $\sim 13 \mu\text{m}$  (**Figure S4 A**). EDX of the uncoated cellulose fiber shows the carbon (C) and calcium (Ca) peaks (**Figure S4 B**). **Figure S4 C** and **E** were characterized using Quanta FEG250 FESEM, operating at a maximum voltage of 5 kV and at magnification of 8.0 kx and 60.0 kx, respectively. **Figure S4 C** shows the coalesced  $\text{Fe}_3\text{O}_4$ -based microparticles of average radius  $\sim 7 \mu\text{m}$ . Thus, the figure confirmed that the magnetic toner ink of the printer deposited  $\text{Fe}_3\text{O}_4$  microparticles while printing was performed. EDX of  $\text{Fe}_3\text{O}_4$ -based microparticles on the cellulose fibers shows the presence of elemental iron (Fe), carbon (C), and oxygen (O) peaks (**Figure S4 D**). **Figure S4 E** shows the presence of the  $\text{MnO}_2$ NPs on the cellulose fibres.<sup>6</sup> The size of the  $\text{MnO}_2$ NPs varied from 70 nm to 400 nm on the fibre surface. The EDX confirmed the presence of the  $\text{MnO}_2$ NPs by showing the Mn and O peaks along with C and Ca peaks of the cellulose fibers. (**Figure S4 F**).

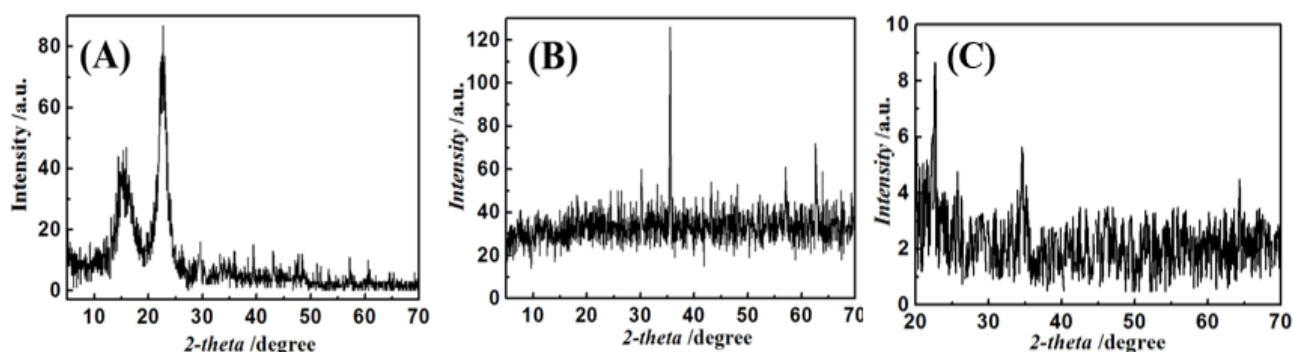

**Figure S5.** X-ray diffraction (XRD) of (A) uncoated printer paper, (B) toner ink and (C)  $\text{MnO}_2$ NP-coated paper.

**Figure S5 A** shows XRD plot for non-printed paper. The plot displayed XRD patterns of microcrystalline cellulose-I with a primary peak at  $2\theta = 22.7^\circ$ , which corresponds to the (200) diffraction plane.<sup>7</sup> This confirmed the presence of cellulose in the paper. The XRD of the toner ink (**Figure S5 B**) showed characteristic diffraction peaks at  $2\theta = 30.1^\circ$ ,  $35.5^\circ$ ,  $43.15^\circ$ ,  $62.6^\circ$  corresponding to the (220), (311), (400), (440) crystallographic planes of magnetite ( $\text{Fe}_3\text{O}_4$ ) particles

and thus confirmed the presence of magnetite in toner ink.<sup>8</sup> **Figure S5 C** showed low intensity primary peak of cellulose at  $22.6^\circ$  and three weak peaks at  $2\theta = 25.75^\circ$ ,  $34.56^\circ$  and  $64.35^\circ$  which corresponded to  $\text{MnO}_2\text{NPs}$ .<sup>6,9</sup>

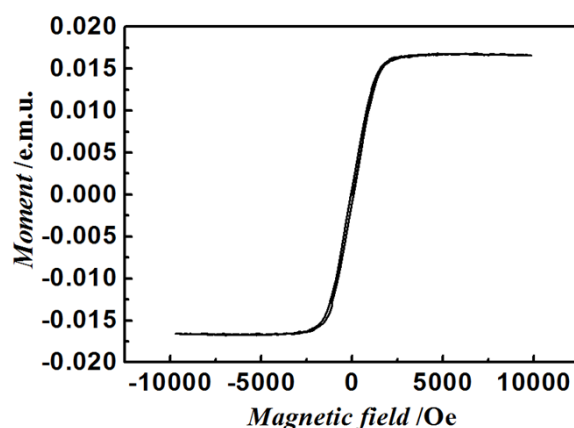

**Figure S6.** Vibrating sample magnetometry (VSM) hysteresis loop of a paper microjet with toner ink-coated outer wall.

**Figure S6** was obtained from the VSM at  $25^\circ\text{C}$  by varying the magnetic field from  $-10$  to  $10$  kOe. The magnetization curve suggested that the  $\text{Fe}_3\text{O}_4$  coating on the outer surface of the paper microjet was soft ferromagnetic in nature and thus responsible for sensitivity of microjet towards applied magnetic field.

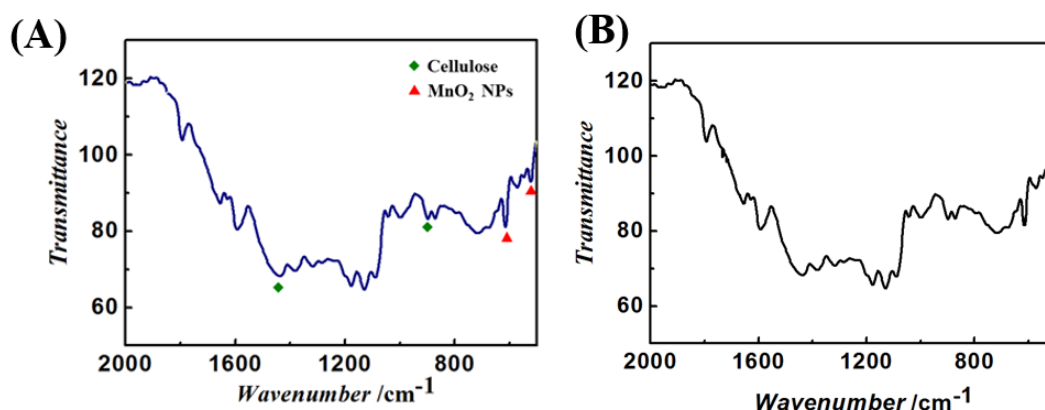

**Figure S7.** FTIR spectra of the  $\text{MnO}_2$  NP-coated paper surface **(A)** before treatment and **(B)** after 5 min treatment with 9%  $\text{H}_2\text{O}_2$  solution.

In the FTIR spectrum (**Figure S7**), the absorption band at  $1427\text{ cm}^{-1}$  and  $895\text{ cm}^{-1}$  could be assigned to a symmetric  $\text{CH}_2$  bending vibration and C-O-C stretching at the  $\beta$  (1,4)- glycosidic linkage for the cellulose in the paper. The absorption bands at  $519\text{ cm}^{-1}$  and  $613\text{ cm}^{-1}$  corresponded to the stretching vibrations of the Mn-O and Mn-O-Mn bonds, respectively, confirming the presence of the  $\text{MnO}_2$ NPs on the paper surface.<sup>6</sup> The persistence of the characteristic peaks for  $\text{MnO}_2$  in **Figure S7 B** suggests that catalytic  $\text{MnO}_2$ NPs remained unaltered after peroxide treatment.

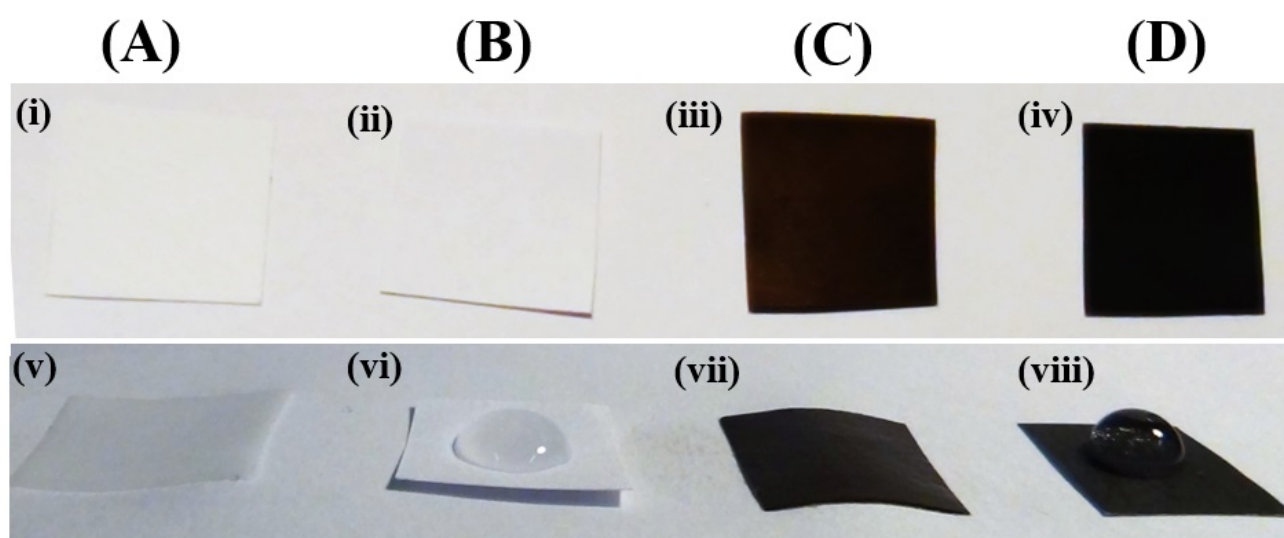

**Figure S8.** Photographs of (A) filter paper (B) uncoated printer paper (C)  $\text{MnO}_2$ NP coated paper (D) printer toner ink coated paper.

**Figure S8** shows the fate of a  $100\text{ }\mu\text{L}$  of water droplet when dispensed (A) filter paper (B) uncoated printer paper (C)  $\text{MnO}_2$ NP coated printer paper (D) printer toner ink coated paper. The color of the printer paper turned from white to dark brown<sup>6</sup> after the deposition of  $\text{MnO}_2$ NP on its surface (**Figure S8 C**) and white to black after taking the print from the printer (**Figure S8 D**). When dispensed, the water droplet got fully absorbed in the filter paper (**Figure S8 A (v)**) whereas showed partial wetting on the uncoated printer paper (**Figure S8 A (vi)**) and also on the paper coated with printer toner ink (**Figure S8 A (vii)**). The appearance of the droplet confirmed that the hydrophobicity of the paper coated with printer toner ink was larger than the non-coated one. In



comparison, the water droplet formed a thin film on the MnO<sub>2</sub>NP coated printer paper (**Figure S8 A (viii)**). The experiment confirmed that, while the hydrophobicity of the outer printed side increased the lifetime of the microjet by increasing the time for dissolution, the wetting inner core ensured maximum contact of MnO<sub>2</sub>NPs with the peroxide fuel for the chemical locomotion.

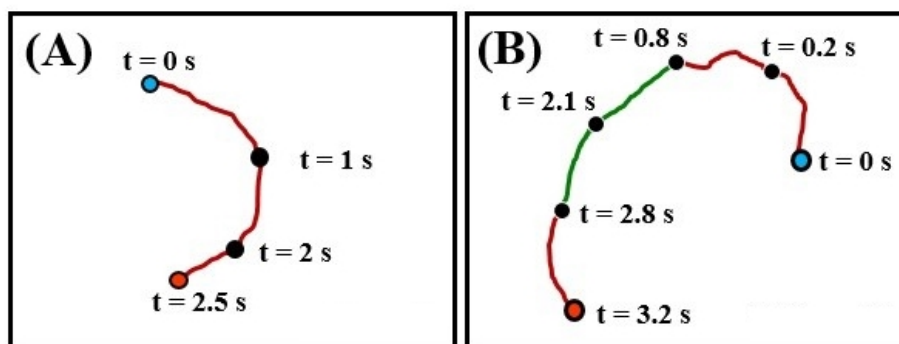

**Figure S9.** Motion trajectory of a (A) non-printed catalytic paper microjet in 16% (v/v) H<sub>2</sub>O<sub>2</sub> solution (B) the coupled chemical and magnetophoretic locomotion of a catalytic paper microjet in 16% (v/v) H<sub>2</sub>O<sub>2</sub> solution. The solid red lines shows the catalytic motion of the microjet and the green shows the motion in the presence of magnetic field. The blue circles and the red circles represent the initial and final position of the paperjet respectively.

**Figure S9 A** shows the motion trajectory of a non-printed catalytic paper microjet (~ 900 μm) inside a bath of 16% (v/v) hydrogen peroxide (H<sub>2</sub>O<sub>2</sub>) solution (as shown in **Video S1**) at various time intervals. **Figure S9 B** shows the motion trajectory for the coupled chemical and magnetophoretic locomotion of a ~ 900 μm catalytic paper microjet in 16% (v/v) H<sub>2</sub>O<sub>2</sub> solution (as shown in **Video S4**).

## SUPPORTING VIDEOS

**Supporting Video S1:** The video clip demonstrates the motion of a non-printed catalytic paper microjet (~ 900 μm) inside a bath of 16% (v/v) hydrogen peroxide (H<sub>2</sub>O<sub>2</sub>) solution. When the paper microjet was immersed in a 16% (v/v) aqueous peroxide solution, the O<sub>2</sub> bubbles were accumulated inside the tube due to the catalytic decomposition of the peroxide fuel on the MnO<sub>2</sub>NPs at the inner hollow core. With progress in time, the bubbles grew and advanced towards one of the openings of



the microjet before ejected out of the microjet. The continuous ejection of the O<sub>2</sub> microbubbles from one side of the microtube provided the thrust for the motion.

**Supporting Video S2:** The video clip demonstrates a ~900 μm catalytic paper microjet in a bath of water (absence of H<sub>2</sub>O<sub>2</sub>). In this situation, no bubble ejection was observed from microjet and the microjet remained stationary during the course of observation. The experiment confirmed the microjet propulsion occurs only in presence of H<sub>2</sub>O<sub>2</sub> as fuel.

**Supporting Video S3:** The video clip shows a ~900 μm paper microjet without inner MnO<sub>2</sub>NPs coating suspended in a bath of 16% (v/v) H<sub>2</sub>O<sub>2</sub> solution. In this situation, again the microjet remained stationary due to the absence of catalytic MnO<sub>2</sub>NPs inside the inner hollow core. The experiment confirmed the propulsion by O<sub>2</sub> bubbles generated due to catalytic decomposition of H<sub>2</sub>O<sub>2</sub> by MnO<sub>2</sub>NPs.

**Supporting Video S4:** The video clip shows the coupled chemical and magnetophoretic locomotion of a ~ 900 μm catalytic paper microjet in 16% (v/v) H<sub>2</sub>O<sub>2</sub> solution. While the catalytic MnO<sub>2</sub>NPs inside the inner hollow core produced oxygen bubbles to produce the chemical locomotion, the external magnetic field induced a magnetophoretic motion to the microjet due to the presence of the magnetic Fe<sub>3</sub>O<sub>4</sub> particles on the outer surface of the microjet. The video has been slowed down by 2x times.

**Supporting Video S5:** The video clip shows the motion of the catalytic microjet in aqueous 12% (v/v) H<sub>2</sub>O<sub>2</sub> solution under microscope. The fluorescent tracer provided an optical indication of the local position of the paper microjet.

**Supporting Video S6:** The video clip shows the self-propulsion of the magneto-catalytic paperjet in 10% (v/v) peroxide solution (in the absence of magnetic field). The microjet shows catalytic propulsion in roughly straight-line trajectory.

**Supporting Video S7:** The video clip shows the steering of the self-propelling magneto-catalytic paperjet in 10% (v/v) peroxide solution with the help of a bar magnet.

**Supporting Video S8:** The video clip shows the magnetically-guided motion of a Rhodamine 6G-loaded paper microjet (~ 900  $\mu\text{m}$ ) inside a fuel-free water.

**Supporting Video S9:** The video clip shows the motion of a catalytic paper microjet (~ 900  $\mu\text{m}$ ) inside a bath of 10% (v/v) hydrogen peroxide ( $\text{H}_2\text{O}_2$ ) solution. The speed of the microjet dropped with the decrease in the concentration of  $\text{H}_2\text{O}_2$  fuel from 16% to 10%.

## REFERENCES

- 1 M. Ataefard, *J. Compos. Mater.*, 2014, **0**, 1–9.
- 2 Y. Wang, X. Zhang, X. He, W. Zhang, X. Zhang and C. Lu, *Carbohydr. Polym.*, 2014, **110**, 302–308.
- 3 H. Wang, G. Zhao and M. Pumera, *J. Am. Chem. Soc.*, 2014, **136**, 2719–2722.
- 4 R. Pinto, A. L. Amaral, E. C. Ferreira, M. Mota, M. Vilanova, K. Ruel and M. Gama, *BMC Biotechnol.*, 2008, **8**, 1.
- 5 A. K. Singh, K. K. Dey, A. Chattopadhyay, T. K. Mandal and D. Bandyopadhyay, *Nanoscale*, 2014, **6**, 1398–1405.
- 6 L. Zhou, J. He, J. Zhang, Z. He, Y. Hu, C. Zhang and H. He, *J. Phys. Chem. C*, 2011, **115**, 16873–16878.
- 7 K. C. Cheng, J. M. Catchmark and A. Demirci, *J. Biol. Eng.*, 2009, **3**, 12.
- 8 M. Ma, Y. Zhang, Z. Guo and N. Gu, *Nanoscale Res. Lett.*, 2013, **8**, 16.
- 9 A. Shaabani, Z. Hezarkhani, S. Shaabani, *RSC Adv.*, 2014, **4**, 64419–64428.
